# Supplementary material
Source: HighWire-hosted journal article supplement (https://bmjopen.bmj.com/content/15/3/e098112)
Supplement: inline-supplementary-material-1 [file inline-supplementary-material-1.pdf]

Table 1 Search strategies for databases

| 1.Database: PubMed    Number of results:146    Date of Update Search: February 10th, 2025                                  |                                                                                                                                                                                                                                                                                                                                                                                                                                                                                                                                                             |           |
|----------------------------------------------------------------------------------------------------------------------------|-------------------------------------------------------------------------------------------------------------------------------------------------------------------------------------------------------------------------------------------------------------------------------------------------------------------------------------------------------------------------------------------------------------------------------------------------------------------------------------------------------------------------------------------------------------|-----------|
| Search limit: a. Publication Dates: 2009-05-01 - 2024-12-31<br>b. Humans or Animal: Human<br>c. Language: English, Chinese |                                                                                                                                                                                                                                                                                                                                                                                                                                                                                                                                                             |           |
| NO.                                                                                                                        | Search strategies                                                                                                                                                                                                                                                                                                                                                                                                                                                                                                                                           | Results   |
| #1                                                                                                                         | student*[Title/Abstract] OR undergrad*[Title/Abstract] OR trainee*[Title/Abstract] OR pupil*[Title/Abstract] OR educat*[Title/Abstract] OR intern*[Title/Abstract] OR pre-registrat*[Title/Abstract] OR “pre registrat*” [Title/Abstract]                                                                                                                                                                                                                                                                                                                   | 2,372,640 |
| #2                                                                                                                         | nurs*[Title/Abstract]                                                                                                                                                                                                                                                                                                                                                                                                                                                                                                                                       | 573,734   |
| #3                                                                                                                         | "Students, Nursing"[Mesh] OR "Education, Nursing"[Mesh]                                                                                                                                                                                                                                                                                                                                                                                                                                                                                                     | 105,296   |
| #4                                                                                                                         | (#1 AND #2) OR #3                                                                                                                                                                                                                                                                                                                                                                                                                                                                                                                                           | 208,941   |
| #5                                                                                                                         | "Clinical Clerkship"[Mesh] OR ("Hospitals"[Mesh]) OR "Preceptorship"[Mesh]                                                                                                                                                                                                                                                                                                                                                                                                                                                                                  | 343,415   |
| #6                                                                                                                         | "Clinical practice"[Title/Abstract] OR "clinical training"[Title/Abstract] OR placement*[Title/Abstract] OR clerkship[Title/Abstract] OR preceptorship[Title/Abstract] OR rotation*[Title/Abstract] OR practicum*[Title/Abstract] OR internship[Title/Abstract] OR "clinical setting*" [Title/Abstract] OR "clinical environment"[Title/Abstract] OR "clinical education"[Title/Abstract] OR hospital*[Title/Abstract] OR "clinical context*" [Title/Abstract]                                                                                              | 2,487,153 |
| #7                                                                                                                         | #5 OR #6                                                                                                                                                                                                                                                                                                                                                                                                                                                                                                                                                    | 2,595,302 |
| #8                                                                                                                         | "transition shock"[Title/Abstract] OR "reality shock"[Title/Abstract] OR "emotional shock"[Title/Abstract] OR "culture shock"[Title/Abstract] OR "role adaptation"[Title/Abstract] OR "role transition"[Title/Abstract] OR "stressful transition"[Title/Abstract] OR "transitional challenges"[Title/Abstract] OR "real-world shock"[Title/Abstract] OR "maladaptive transitions"[Title/Abstract] OR "transition experience"[Title/Abstract] OR "transfer* shock"[Title/Abstract] OR "shock of reality"[Title/Abstract] OR "shock reaction"[Title/Abstract] | 1,473     |
| #9                                                                                                                         | (#4 AND #7 AND #8) AND (2009/5/1:2024/12/31[pdat]) AND (chinese[Filter] OR english[Filter]) AND                                                                                                                                                                                                                                                                                                                                                                                                                                                             | 146       |

|                                                                                                          |                                                                                                                                                                                                                                                                                                                                                                                                                                                                                                                                                 |           |
|----------------------------------------------------------------------------------------------------------|-------------------------------------------------------------------------------------------------------------------------------------------------------------------------------------------------------------------------------------------------------------------------------------------------------------------------------------------------------------------------------------------------------------------------------------------------------------------------------------------------------------------------------------------------|-----------|
|                                                                                                          | (humans[Filter])                                                                                                                                                                                                                                                                                                                                                                                                                                                                                                                                |           |
| <b>2.Database: Scopus    Number of results:287    Date of Update Search: February 10th, 2025</b>         |                                                                                                                                                                                                                                                                                                                                                                                                                                                                                                                                                 |           |
| Search limit: a. Publication Years: 2009-2024<br>b. Language: English, Chinese                           |                                                                                                                                                                                                                                                                                                                                                                                                                                                                                                                                                 |           |
| NO.                                                                                                      | Search strategies                                                                                                                                                                                                                                                                                                                                                                                                                                                                                                                               | Results   |
| #1                                                                                                       | TITLE-ABS-KEY(student*) OR TITLE-ABS-KEY(undergrad*) OR TITLE-ABS-KEY(trainee*) OR TITLE-ABS-KEY(pupil*) OR TITLE-ABS-KEY(educat*) OR TITLE-ABS-KEY(intern*) OR TITLE-ABS-KEY(pre-registrat*) OR TITLE-ABS-KEY("pre registrat*")                                                                                                                                                                                                                                                                                                                | 9,042,349 |
| #2                                                                                                       | TITLE-ABS-KEY (nurs*)                                                                                                                                                                                                                                                                                                                                                                                                                                                                                                                           | 1,050,651 |
| #3                                                                                                       | #1 AND #2                                                                                                                                                                                                                                                                                                                                                                                                                                                                                                                                       | 343,327   |
| #4                                                                                                       | TITLE-ABS-KEY("clinical practice") OR TITLE-ABS-KEY("clinical training") OR TITLE-ABS-KEY(placement*) OR TITLE-ABS-KEY(clerkship) OR TITLE-ABS-KEY(preceptorship) OR TITLE-ABS-KEY (rotation*) OR TITLE-ABS-KEY(practicum*) OR TITLE-ABS-KEY(internship) OR TITLE-ABS-KEY("clinical setting*") OR TITLE-ABS-KEY("clinical environment") OR TITLE-ABS-KEY("clinical education") OR TITLE-ABS-KEY (hospital*) OR TITLE-ABS-KEY ("clinical context*")                                                                                              | 4,978,153 |
| #5                                                                                                       | TITLE-ABS-KEY("transition shock") OR TITLE-ABS-KEY("reality shock") OR TITLE-ABS-KEY ("emotional shock") OR TITLE-ABS-KEY("culture shock") OR TITLE-ABS-KEY("role adaptation") OR TITLE-ABS-KEY ("role transition") OR TITLE-ABS-KEY("stressful transition") OR TITLE-ABS-KEY("transitional challenges") OR TITLE-ABS-KEY("real-world shock") OR TITLE-ABS-KEY("maladaptive transitions") OR TITLE-ABS-KEY("transition experience") OR TITLE-ABS-KEY("transfer* shock") OR TITLE-ABS-KEY("shock of reality") OR TITLE-ABS-KEY("shock reaction") | 4,969     |
| #6                                                                                                       | (#3 AND #4 AND #5) AND (PUBYEAR > 2008 AND PUBYEAR < 2025) AND (LIMIT-TO (LANGUAGE, "English") OR LIMIT-TO (LANGUAGE, "Chinese"))                                                                                                                                                                                                                                                                                                                                                                                                               | 287       |
| <b>3.Database: Web of Science    Number of results:355    Date of Update Search: February 10th, 2025</b> |                                                                                                                                                                                                                                                                                                                                                                                                                                                                                                                                                 |           |

|                                                                                                   |                                                                                                                                                                                                                                                                                                                                                                                                            |            |
|---------------------------------------------------------------------------------------------------|------------------------------------------------------------------------------------------------------------------------------------------------------------------------------------------------------------------------------------------------------------------------------------------------------------------------------------------------------------------------------------------------------------|------------|
| Search limit: a. Publication Years: 2009-2024                                                     |                                                                                                                                                                                                                                                                                                                                                                                                            |            |
| b. Language: English, Chinese                                                                     |                                                                                                                                                                                                                                                                                                                                                                                                            |            |
| NO.                                                                                               | Search strategies                                                                                                                                                                                                                                                                                                                                                                                          | Results    |
| #1                                                                                                | TS=(student*) OR TS=(undergrad*) OR TS=(trainee*) OR TS=(pupil*) OR TS=(educat*) OR TS=(intern*)<br><br>OR TS=(pre-registrat*) OR TS=(“pre registrat”*)                                                                                                                                                                                                                                                    | 12,945,834 |
| #2                                                                                                | TS=(nurs*)                                                                                                                                                                                                                                                                                                                                                                                                 | 1,460,253  |
| #3                                                                                                | #1 AND #2                                                                                                                                                                                                                                                                                                                                                                                                  | 430,919    |
| #4                                                                                                | TS=("Clinical practice") OR TS=("clinical training") OR TS=(placement*) OR TS=(clerkship) OR<br>TS=(preceptorship) OR TS=(rotation*) OR TS=(practicum*) OR TS=(internship) OR TS=("clinical setting*")<br>OR TS=("clinical environment") OR TS=("clinical education") OR TS=(hospital*) OR TS=("clinical context*")                                                                                        | 7,481,724  |
| #5                                                                                                | TS=("transition shock") OR TS=("reality shock") OR TS=("emotional shock") OR TS=("culture shock") OR<br>TS=("role adaptation") OR TS=("role transition") OR TS=("stressful transition") OR TS=("transitional<br>challenges") OR TS=("real-world shock") OR TS=("maladaptive transitions") OR TS=("transition experience")<br>OR TS=("transfer* shock") OR TS=("shock of reality") OR TS=("shock reaction") | 5,651      |
| #6                                                                                                | #3 AND #4 AND #5                                                                                                                                                                                                                                                                                                                                                                                           | 510        |
| #7                                                                                                | #6 AND (2009 OR 2010 OR 2011 OR 2012 OR 2013 OR 2014 OR 2015 OR 2016 OR 2017 OR 2018 OR 2019<br>OR 2020 OR 2021 OR 2022 OR 2023 OR 2024) (Publication Years)                                                                                                                                                                                                                                               | 379        |
| #8                                                                                                | #7 AND (English or Chinese) (Languages)                                                                                                                                                                                                                                                                                                                                                                    | 355        |
| 4.Database: Cochrane Library    Number of results:7    Date of Update Search: February 10th, 2025 |                                                                                                                                                                                                                                                                                                                                                                                                            |            |
| Search limit: a. Publication Dates: 2009-05-01 - 2024-12-31                                       |                                                                                                                                                                                                                                                                                                                                                                                                            |            |
| NO.                                                                                               | Search strategies                                                                                                                                                                                                                                                                                                                                                                                          | Results    |
| #1                                                                                                | (student*):ti,ab,kw OR (undergrad*):ti,ab,kw OR ( trainee*):ti,ab,kw OR (pupil*):ti,ab,kw OR<br>(educat*):ti,ab,kw OR (intern*):ti,ab,kw OR (pre-registrat*):ti,ab,kw OR (pre NEXT registrat*):ti,ab,kw                                                                                                                                                                                                    | 260,666    |
| #2                                                                                                | (nurs*):ti,ab,kw                                                                                                                                                                                                                                                                                                                                                                                           | 61,966     |
| #3                                                                                                | #1 AND #2                                                                                                                                                                                                                                                                                                                                                                                                  | 21,120     |

|                                                                                                     |                                                                                                                                                                                                                                                                                                                                                                                                                                                                                          |         |
|-----------------------------------------------------------------------------------------------------|------------------------------------------------------------------------------------------------------------------------------------------------------------------------------------------------------------------------------------------------------------------------------------------------------------------------------------------------------------------------------------------------------------------------------------------------------------------------------------------|---------|
| #4                                                                                                  | MeSH descriptor: [Students, Nursing] explode all trees                                                                                                                                                                                                                                                                                                                                                                                                                                   | 920     |
| #5                                                                                                  | MeSH descriptor: [Education, Nursing] explode all trees                                                                                                                                                                                                                                                                                                                                                                                                                                  | 1,314   |
| #6                                                                                                  | #3 OR #4 OR #5                                                                                                                                                                                                                                                                                                                                                                                                                                                                           | 21,120  |
| #7                                                                                                  | ("Clinical practice"):ti,ab,kw OR ("clinical training"):ti,ab,kw OR (placement*):ti,ab,kw OR (clerkship):ti,ab,kw OR (preceptorship):ti,ab,kw OR (rotation*):ti,ab,kw OR (practicum*):ti,ab,kw OR (internship):ti,ab,kw OR (clinical NEXT setting*):ti,ab,kw OR ("clinical environment"):ti,ab,kw OR ("clinical education"):ti,ab,kw OR (hospital*):ti,ab,kw OR (clinical NEXT context*):ti,ab,kw                                                                                        | 320,646 |
| #8                                                                                                  | MeSH descriptor: [Clinical Clerkship] explode all trees                                                                                                                                                                                                                                                                                                                                                                                                                                  | 213     |
| #9                                                                                                  | MeSH descriptor: [Preceptorship] explode all trees                                                                                                                                                                                                                                                                                                                                                                                                                                       | 52      |
| #10                                                                                                 | MeSH descriptor: [Hospitals] explode all trees                                                                                                                                                                                                                                                                                                                                                                                                                                           | 5,967   |
| #11                                                                                                 | #7 OR #8 OR #9 OR #10                                                                                                                                                                                                                                                                                                                                                                                                                                                                    | 321,014 |
| #12                                                                                                 | ("transition shock"):ti,ab,kw OR ("reality shock"):ti,ab,kw OR ("emotional shock"):ti,ab,kw OR ("culture shock"):ti,ab,kw OR ("role adaptation"):ti,ab,kw OR ("role transition"):ti,ab,kw OR ("stressful transition"):ti,ab,kw OR ("transitional challenges"):ti,ab,kw OR ("real-world shock"):ti,ab,kw OR ("maladaptive transitions"):ti,ab,kw OR ("transition experience"):ti,ab,kw OR (transfer* NEXT shock):ti,ab,kw OR ("shock of reality"):ti,ab,kw OR ("shock reaction"):ti,ab,kw | 72      |
| #13                                                                                                 | #6 AND #11 AND #12 with Cochrane Library publication date Between May 2009 and Dec 2024                                                                                                                                                                                                                                                                                                                                                                                                  | 7       |
| 5.Database: ScienceDirect      Number of results:11      Date of Update Search: February 11th, 2025 |                                                                                                                                                                                                                                                                                                                                                                                                                                                                                          |         |
| Search limit: a. Publication Years: 2009-2024                                                       |                                                                                                                                                                                                                                                                                                                                                                                                                                                                                          |         |
| NO.                                                                                                 | Search strategies                                                                                                                                                                                                                                                                                                                                                                                                                                                                        | Results |
| #1                                                                                                  | Title, abstract, keywords:(“nursing students” OR “nursing interns” OR “Pupil Nurses”) AND (“clinical practice” OR “clinical placement” OR “clinical practicum”) AND (“transition shock” OR “reality shock” OR “transition experience”)                                                                                                                                                                                                                                                   | 11      |

|                                                                                                              |                                                                                                                                                                                                                                                                                                                                                                                                                                                           |           |
|--------------------------------------------------------------------------------------------------------------|-----------------------------------------------------------------------------------------------------------------------------------------------------------------------------------------------------------------------------------------------------------------------------------------------------------------------------------------------------------------------------------------------------------------------------------------------------------|-----------|
|                                                                                                              | Max 8 Boolean connectors<br>Wildcards not supported                                                                                                                                                                                                                                                                                                                                                                                                       |           |
| <b>6.Database: Embase      Number of results:181</b>                                                         |                                                                                                                                                                                                                                                                                                                                                                                                                                                           |           |
| Search limit: a. Publication Years: 2009-2024<br>b. Humans or Animal: Human<br>c. Language: English, Chinese |                                                                                                                                                                                                                                                                                                                                                                                                                                                           |           |
| NO.                                                                                                          | Search strategies                                                                                                                                                                                                                                                                                                                                                                                                                                         | Results   |
| #1                                                                                                           | 'nursing student'/exp                                                                                                                                                                                                                                                                                                                                                                                                                                     | 36,537    |
| #2                                                                                                           | 'nursing education'/exp                                                                                                                                                                                                                                                                                                                                                                                                                                   | 101,752   |
| #3                                                                                                           | student*:ti,ab,kw OR undergrad*:ti,ab,kw OR trainee*:ti,ab,kw OR pupil*:ti,ab,kw OR educat*:ti,ab,kw OR intern*:ti,ab,kw OR 'pre registrat*':ti,ab,kw                                                                                                                                                                                                                                                                                                     | 3,226,975 |
| #4                                                                                                           | nurs*:ti,ab,kw                                                                                                                                                                                                                                                                                                                                                                                                                                            | 689,402   |
| #5                                                                                                           | #3 AND #4                                                                                                                                                                                                                                                                                                                                                                                                                                                 | 198,770   |
| #6                                                                                                           | #1 OR #2 OR #5                                                                                                                                                                                                                                                                                                                                                                                                                                            | 257,318   |
| #7                                                                                                           | 'clinical practice':ti,ab,kw OR 'clinical training':ti,ab,kw OR placement*:ti,ab,kw OR clerkship:ti,ab,kw OR preceptorship:ti,ab,kw OR rotation*:ti,ab,kw OR practicum*:ti,ab,kw OR internship:ti,ab,kw OR 'clinical setting*':ti,ab,kw OR 'clinical environment':ti,ab,kw OR 'clinical education':ti,ab,kw OR hospital*:ti,ab,kw OR 'clinical context*':ti,ab,kw                                                                                         | 3,737,457 |
| #8                                                                                                           | 'clinical education'/exp                                                                                                                                                                                                                                                                                                                                                                                                                                  | 18,319    |
| #9                                                                                                           | 'hospital'/exp                                                                                                                                                                                                                                                                                                                                                                                                                                            | 1,592,843 |
| #10                                                                                                          | #7 OR #8 OR #9                                                                                                                                                                                                                                                                                                                                                                                                                                            | 4,424,643 |
| #11                                                                                                          | 'transition shock':ti,ab,kw OR 'reality shock':ti,ab,kw OR 'emotional shock':ti,ab,kw OR 'culture shock':ti,ab,kw OR 'role adaptation':ti,ab,kw OR 'role transition':ti,ab,kw OR 'stressful transition':ti,ab,kw OR 'transitional challenges':ti,ab,kw OR 'real-world shock':ti,ab,kw OR 'maladaptive transitions':ti,ab,kw OR 'transition experience':ti,ab,kw OR 'transfer* shock':ti,ab,kw OR 'shock of reality':ti,ab,kw OR 'shock reaction':ti,ab,kw | 1,739     |
| #12                                                                                                          | #6 AND #10 AND #11                                                                                                                                                                                                                                                                                                                                                                                                                                        | 249       |

|                                                                                                       |                                                                                                                                                                                                                                                                                                                                                                                                                                                                                                                                                                                                                                                                               |         |
|-------------------------------------------------------------------------------------------------------|-------------------------------------------------------------------------------------------------------------------------------------------------------------------------------------------------------------------------------------------------------------------------------------------------------------------------------------------------------------------------------------------------------------------------------------------------------------------------------------------------------------------------------------------------------------------------------------------------------------------------------------------------------------------------------|---------|
| #13                                                                                                   | #12 AND ([chinese]/lim OR [english]/lim) AND [humans]/lim AND [2009-2024]/py                                                                                                                                                                                                                                                                                                                                                                                                                                                                                                                                                                                                  | 181     |
| <b>7.Database: ProQuest      Number of results:27      Date of Update Search: February 11th, 2025</b> |                                                                                                                                                                                                                                                                                                                                                                                                                                                                                                                                                                                                                                                                               |         |
| Search limit: a. Publication Dates: 2009-05-01 - 2024-12-31<br>b. Language: English, Chinese          |                                                                                                                                                                                                                                                                                                                                                                                                                                                                                                                                                                                                                                                                               |         |
| NO.                                                                                                   | Search strategies                                                                                                                                                                                                                                                                                                                                                                                                                                                                                                                                                                                                                                                             | Results |
| #1                                                                                                    | title (student* OR undergrad* OR trainee* OR pupil* OR educat* OR intern* OR pre-registrat* OR “pre registrat*”) OR abstract (student* OR undergrad* OR trainee* OR pupil* OR educat* OR intern* OR pre-registrat* OR “pre registrat*”)                                                                                                                                                                                                                                                                                                                                                                                                                                       | 773,204 |
| #2                                                                                                    | title(nurs*) OR abstract(nurs*)                                                                                                                                                                                                                                                                                                                                                                                                                                                                                                                                                                                                                                               | 67,252  |
| #3                                                                                                    | #1 AND #2                                                                                                                                                                                                                                                                                                                                                                                                                                                                                                                                                                                                                                                                     | 22,065  |
| #4                                                                                                    | title ("clinical practice" OR "clinical training" OR placement* OR clerkship OR preceptorship OR rotation* OR practicum* OR internship OR "clinical setting*" OR "clinical environment" OR "clinical education" OR hospital* OR "clinical context*") OR abstract ("clinical practice" OR "clinical training" OR placement* OR clerkship OR preceptorship OR rotation* OR practicum* OR internship OR "clinical setting*" OR "clinical environment" OR "clinical education" OR hospital* OR "clinical context*")                                                                                                                                                               | 473,472 |
| #5                                                                                                    | title ("transition shock" OR "reality shock" OR "emotional shock" OR "culture shock" OR "role adaptation" OR "role transition" OR "stressful transition" OR "transitional challenges" OR "real-world shock" OR "maladaptive transitions" OR "transition experience" OR "transfer* shock" OR "shock of reality" OR "shock reaction") OR abstract ("transition shock" OR "reality shock" OR "emotional shock" OR "culture shock" OR "role adaptation" OR "role transition" OR "stressful transition" OR "transitional challenges" OR "real-world shock" OR "maladaptive transitions" OR "transition experience" OR "transfer* shock" OR "shock of reality" OR "shock reaction") | 455     |
| #6                                                                                                    | #3 AND #4 AND #5                                                                                                                                                                                                                                                                                                                                                                                                                                                                                                                                                                                                                                                              | 27      |

|                                                                                                                            |                                                                                                                                                                                                                                                                                                                                        |           |
|----------------------------------------------------------------------------------------------------------------------------|----------------------------------------------------------------------------------------------------------------------------------------------------------------------------------------------------------------------------------------------------------------------------------------------------------------------------------------|-----------|
| <b>8.Database: PsycInfo      Number of results:112      Date of Update Search: February 11th, 2025</b>                     |                                                                                                                                                                                                                                                                                                                                        |           |
| Search limit: a. Publication Dates: 2009-05-01 - 2024-12-31<br>b. Humans or animal: Human<br>c. Language: English, Chinese |                                                                                                                                                                                                                                                                                                                                        |           |
| NO.                                                                                                                        | Search strategies                                                                                                                                                                                                                                                                                                                      | Results   |
| #1                                                                                                                         | TX (student* OR undergrad* OR trainee* OR pupil* OR educat* OR intern* OR pre-registrat* OR “pre<br>registrat*”)                                                                                                                                                                                                                       | 2,688,224 |
| #2                                                                                                                         | TX nurs*                                                                                                                                                                                                                                                                                                                               | 220,312   |
| #3                                                                                                                         | #1 AND #2                                                                                                                                                                                                                                                                                                                              | 121,035   |
| #4                                                                                                                         | TX ("clinical practice" OR "clinical training" OR placement* OR clerkship OR preceptorship OR rotation* OR<br>practicum* OR internship OR "clinical setting*" OR "clinical environment" OR "clinical education" OR<br>hospital* OR "clinical context*")                                                                                | 719,872   |
| #5                                                                                                                         | TX ("transition shock" OR "reality shock" OR "emotional shock" OR "culture shock" OR "role adaptation" OR<br>"role transition" OR "stressful transition" OR "transitional challenges" OR "real-world shock" OR "maladaptive<br>transitions" OR "transition experience" OR "transfer* shock" OR "shock of reality" OR "shock reaction") | 1,863     |
| #6                                                                                                                         | #3 AND #4 AND #5                                                                                                                                                                                                                                                                                                                       | 112       |
| <b>9.Database: CINAHL Plus with Full Text      Number of results:158      Date of Update Search: February 11th, 2025</b>   |                                                                                                                                                                                                                                                                                                                                        |           |
| Search limit: a. Publication Dates: 2009-05-01 - 2024-12-31<br>b. Humans or animal: Human<br>c. Language: English, Chinese |                                                                                                                                                                                                                                                                                                                                        |           |
| NO.                                                                                                                        | Search strategies                                                                                                                                                                                                                                                                                                                      | Results   |
| #1                                                                                                                         | MH "Students, Nursing"                                                                                                                                                                                                                                                                                                                 | 38,325    |
| #2                                                                                                                         | MH "Education, Nursing"                                                                                                                                                                                                                                                                                                                | 53,834    |

|     |                                                                                                                                                                                                                                                                                                                                                                                                                                                                                                                                                                                                                                                                                     |         |
|-----|-------------------------------------------------------------------------------------------------------------------------------------------------------------------------------------------------------------------------------------------------------------------------------------------------------------------------------------------------------------------------------------------------------------------------------------------------------------------------------------------------------------------------------------------------------------------------------------------------------------------------------------------------------------------------------------|---------|
| #3  | TI ( student* OR undergrad* OR trainee* OR pupil* OR educat* OR intern* OR pre-registrat* OR “pre<br>registrat*”) OR AB ( student* OR undergrad* OR trainee* OR pupil* OR educat* OR intern* OR pre-registrat*<br>OR “pre registrat*”)                                                                                                                                                                                                                                                                                                                                                                                                                                              | 861,039 |
| #4  | TI nurs* OR AB nurs*                                                                                                                                                                                                                                                                                                                                                                                                                                                                                                                                                                                                                                                                | 600,397 |
| #5  | #3 AND #4                                                                                                                                                                                                                                                                                                                                                                                                                                                                                                                                                                                                                                                                           | 153,744 |
| #6  | #1 OR #2 OR #5                                                                                                                                                                                                                                                                                                                                                                                                                                                                                                                                                                                                                                                                      | 191,277 |
| #7  | MH "Education, Clinical"                                                                                                                                                                                                                                                                                                                                                                                                                                                                                                                                                                                                                                                            | 12,826  |
| #8  | MH "Hospitals"                                                                                                                                                                                                                                                                                                                                                                                                                                                                                                                                                                                                                                                                      | 69,369  |
| #9  | MH "Preceptorship"                                                                                                                                                                                                                                                                                                                                                                                                                                                                                                                                                                                                                                                                  | 5,238   |
| #10 | TI ("clinical practice" OR "clinical training" OR placement* OR clerkship OR preceptorship OR rotation* OR<br>practicum* OR internship OR "clinical setting*" OR "clinical environment" OR "clinical education" OR<br>hospital* OR "clinical context*") OR AB ("clinical practice" OR "clinical training" OR placement* OR<br>clerkship OR preceptorship OR rotation* OR practicum* OR internship OR "clinical setting*" OR "clinical<br>environment" OR "clinical education" OR hospital* OR "clinical context*")                                                                                                                                                                  | 754,599 |
| #11 | #7 OR #8 OR #9 OR #10                                                                                                                                                                                                                                                                                                                                                                                                                                                                                                                                                                                                                                                               | 790,843 |
| #12 | MH "Reality Shock"                                                                                                                                                                                                                                                                                                                                                                                                                                                                                                                                                                                                                                                                  | 245     |
| #13 | TI ("transition shock" OR "reality shock" OR "emotional shock" OR "culture shock" OR "role adaptation" OR<br>"role transition" OR "stressful transition" OR "transitional challenges" OR "real-world shock" OR "maladaptive<br>transitions" OR "transition experience" OR "transfer* shock" OR "shock of reality" OR "shock reaction") OR<br>AB ("transition shock" OR "reality shock" OR "emotional shock" OR "culture shock" OR "role adaptation" OR<br>"role transition" OR "stressful transition" OR "transitional challenges" OR "real-world shock" OR "maladaptive<br>transitions" OR "transition experience" OR "transfer* shock" OR "shock of reality" OR "shock reaction") | 1,279   |
| #14 | #12 OR #13                                                                                                                                                                                                                                                                                                                                                                                                                                                                                                                                                                                                                                                                          | 1,421   |



|                                                                                                                  |                                                                                                                                                                                                                                                                                                                                                                                                                                                                                                                                                                                                                                                                                                                                                         |                                               |
|------------------------------------------------------------------------------------------------------------------|---------------------------------------------------------------------------------------------------------------------------------------------------------------------------------------------------------------------------------------------------------------------------------------------------------------------------------------------------------------------------------------------------------------------------------------------------------------------------------------------------------------------------------------------------------------------------------------------------------------------------------------------------------------------------------------------------------------------------------------------------------|-----------------------------------------------|
| #15                                                                                                              | #6 AND #11 AND #14                                                                                                                                                                                                                                                                                                                                                                                                                                                                                                                                                                                                                                                                                                                                      | 158                                           |
| <b>10.Database: Google Scholar      Number of results:16,200      Date of Update Search: February 12th, 2025</b> |                                                                                                                                                                                                                                                                                                                                                                                                                                                                                                                                                                                                                                                                                                                                                         |                                               |
| Search limit: a. Publication Years: 2009-2024                                                                    |                                                                                                                                                                                                                                                                                                                                                                                                                                                                                                                                                                                                                                                                                                                                                         |                                               |
| NO.                                                                                                              | Search strategies                                                                                                                                                                                                                                                                                                                                                                                                                                                                                                                                                                                                                                                                                                                                       | Results                                       |
| #1                                                                                                               | ((student* OR undergrad* OR trainee* OR pupil* OR educat* OR intern* OR pre-registrat* OR “pre<br>registrat*”) AND nurs*) AND ("clinical practice" OR "clinical training" OR placement* OR clerkship OR<br>preceptorship OR rotation* OR practicum* OR internship OR "clinical setting*" OR "clinical environment" OR<br>"clinical education" OR hospital* OR "clinical context*") AND ("transition shock" OR "reality shock" OR<br>"emotional shock" OR "culture shock" OR "role adaptation" OR "role transition" OR "stressful transition" OR<br>"transitional challenges" OR "real-world shock" OR "maladaptive transitions" OR "transition experience" OR<br>"transfer* shock" OR "shock of reality" OR "shock reaction")<br>Search limit:2009-2024 | 16,200<br>(limit to<br>the first 20<br>pages) |
| <b>11.Database: OpenGey      Number of results:0      Date of Update Search: February 12th, 2025</b>             |                                                                                                                                                                                                                                                                                                                                                                                                                                                                                                                                                                                                                                                                                                                                                         |                                               |
| Search limit: None                                                                                               |                                                                                                                                                                                                                                                                                                                                                                                                                                                                                                                                                                                                                                                                                                                                                         |                                               |
| NO.                                                                                                              | Search strategies                                                                                                                                                                                                                                                                                                                                                                                                                                                                                                                                                                                                                                                                                                                                       | Results                                       |
| #1                                                                                                               | ((student* OR undergrad* OR trainee* OR pupil* OR educat* OR intern* OR pre-registrat* OR “pre<br>registrat*”) AND nurs*) AND ("clinical practice" OR "clinical training" OR placement* OR clerkship OR<br>preceptorship OR rotation* OR practicum* OR internship OR "clinical setting*" OR "clinical environment" OR<br>"clinical education" OR hospital* OR "clinical context*") AND ("transition shock" OR "reality shock" OR<br>"emotional shock" OR "culture shock" OR "role adaptation" OR "role transition" OR "stressful transition" OR<br>"transitional challenges" OR "real-world shock" OR "maladaptive transitions" OR "transition experience" OR<br>"transfer* shock" OR "shock of reality" OR "shock reaction")                           | 0                                             |

|                                                                                                 |                                                                                                                                                                                                                                                  |         |
|-------------------------------------------------------------------------------------------------|--------------------------------------------------------------------------------------------------------------------------------------------------------------------------------------------------------------------------------------------------|---------|
| 12.Database: CNKI      Number of results:72      Date of Update Search: February 12th, 2025     |                                                                                                                                                                                                                                                  |         |
| Search limit: a. Publication Dates: 2009-05-01 - 2024-12-31                                     |                                                                                                                                                                                                                                                  |         |
| NO.                                                                                             | Search strategies                                                                                                                                                                                                                                | Results |
| #1                                                                                              | TKA='护理学生'+ '护理专业学生'+ '护生'+ '护理本科生'+ '护理专业本科生'+ '实习护士'+ '护理专业实习生'+ '护理实习生' AND TKA= '临床实习'+ '实习'+ '毕业实习'+ '临床学习'+ '临床实践'+ '医院实习' AND TKA='转型冲击'+ '现实冲击'+ '角色适应'+ '冲击体验'+ '角色转型'+ '文化休克'                                                          | 72      |
| 13.Database: Wan Fang      Number of results:89      Date of Update Search: February 12th, 2025 |                                                                                                                                                                                                                                                  |         |
| Search limit: a. Publication Years: 2009-2024                                                   |                                                                                                                                                                                                                                                  |         |
| NO.                                                                                             | Search strategies                                                                                                                                                                                                                                | Results |
| #1                                                                                              | (主题:("护理学生" OR "护理专业学生" OR "护生" OR "护理本科生" OR "护理专业本科生" OR "实习护士" OR "护理专业实习生" OR "护理实习生") and 主题:("临床实习" OR "实习" OR "毕业实习" OR "临床学习" OR "临床实践" OR "医院实习") and 主题:("转型冲击" OR "现实冲击" OR "角色适应" OR "冲击体验" OR "角色转型" OR "文化休克")) and 发表时间:2009-2024 | 89      |
| 14.Database: SinoMed      Number of results:73      Date of Update Search: February 12th, 2025  |                                                                                                                                                                                                                                                  |         |
| Search limit: a. Publication Years: 2009-2024<br>b. Humans or Animal: Human                     |                                                                                                                                                                                                                                                  |         |
| NO.                                                                                             | Search strategies                                                                                                                                                                                                                                | Results |
| #1                                                                                              | "学生, 护理"[不加权:扩展]                                                                                                                                                                                                                                 | 24,595  |

|     |                                                                                                                                                              |         |
|-----|--------------------------------------------------------------------------------------------------------------------------------------------------------------|---------|
| #2  | "教育, 护理"[不加权:扩展]                                                                                                                                             | 38,897  |
| #3  | "护理学生"[常用字段:智能] OR "护理专业学生"[常用字段:智能] OR "护生"[常用字段:智能] OR "护理本科生"[常用字段:智能] OR "护理专业本科生"[常用字段:智能] OR "实习护士"[常用字段:智能] OR "护理专业实习生"[常用字段:智能] OR "护理实习生"[常用字段:智能] | 82,986  |
| #4  | #1 OR #2 OR #3                                                                                                                                               | 68,088  |
| #5  | "临床实习"[不加权:扩展]                                                                                                                                               | 29,864  |
| #6  | "导师制"[不加权:扩展]                                                                                                                                                | 8,944   |
| #7  | "医院"[不加权:扩展]                                                                                                                                                 | 84,991  |
| #8  | "临床实习"[常用字段:智能] OR "实习"[常用字段:智能] OR "毕业实习"[常用字段:智能] OR "临床学习"[常用字段:智能] OR "临床实践"[常用字段:智能] OR "医院实习"[常用字段:智能]                                                 | 230,991 |
| #9  | #5 OR #6 OR #7 OR #8                                                                                                                                         | 591,973 |
| #10 | "转型冲击"[常用字段:智能] OR "现实冲击"[常用字段:智能] OR "角色适应"[常用字段:智能] OR "冲击体验"[常用字段:智能] OR "角色转型"[常用字段:智能] OR "文化休克"[常用字段:智能]                                               | 1,162   |
| #11 | ((#4) AND (#9) AND (#10)) AND ( 人类[特征词]) AND 2009-2024[日期]                                                                                                   | 73      |

Table 2 Data Extraction Form

| NO. | Author(s) | Year of publication | Country of origin | Aim | Study design | Settings | Population and sample size | Assessment tools | Influencing factors | Outcomes | Intervention strategies | Key findings |
|-----|-----------|---------------------|-------------------|-----|--------------|----------|----------------------------|------------------|---------------------|----------|-------------------------|--------------|
|     |           |                     |                   |     |              |          |                            |                  |                     |          |                         |              |

Note:

(1) population and sample size included social demographic of the participants and sample size;

- (2) intervention strategies were defined as measures or programs provided to reduce participants' transition shock;
- (3) outcomes referred to the variables or items influenced by transition shock;
- (4) assessment tools were specific tools or scales used to assess transition shock of nursing students;
- (5) setting referred to the specific location where the study was conducted;
- (6) country of origin referred to which country the study was conducted;
- (7) key findings referred to other information related to the review questions and objectives;
- (8) influencing factors referred to the variables or items that affected transition shock of nursing students.
